# Supplementary material for: Facilely Fabricating F-Doped Fe3N Nanoellipsoids Grown on 3D N-Doped Porous Carbon Framework as a Preeminent Negative Material
Source: MDPI journal article supplement (doi:10.3390/molecules29050959), 2024-02-22
Supplement: s1 [file s1]

# Facilely Fabricating F-Doped Fe<sub>3</sub>N Nanoellipsoids Grown on 3D N-Doped Porous Carbon Framework as a Preeminent Negative Material

Dan Zhang <sup>1,\*</sup>, Chunyan Zhang <sup>1</sup>, Huishi Xu<sup>1</sup>, Zhe Huo<sup>1</sup>, Xinyu Shi<sup>1</sup>, Xiaodi Liu<sup>1</sup>, Guangyin Liu<sup>1</sup> and Chuang Yu<sup>2,\*</sup>

<sup>1</sup> College of Chemistry and Pharmaceutical Engineering, Nanyang Normal University, Nanyang 473061, PR China; zhangchunyanny@163.com (C.Z.); x3243536058@163.com (H.X.); imkc62@163.com (Z.H.); sxy021112@163.com (X.S.); liuxiaodiny@126.com (X.L.); liugy13@163.com (G.L.)

<sup>2</sup> State Key Laboratory of Advanced Electromagnetic Engineering and Technology, School of Electrical and Electronic Engineering, Huazhong University of Science and Technology, Wuhan 430074, PR China

\* Correspondence: danzhangny@163.com (D.Z.); cyu2020@hust.edu.cn (C.Y.)

## **Electrochemical measurements**

The electrochemical performance of the samples was tested using CR2025-type coin cell. The test electrodes were prepared by mixing the samples, carbon black, and binder (polyvinylidene fluoride (PVDF)) at a weight ratio of 7:2:1 in N-methyl-2-pyrrolidinone (NMP). The resulting slurries were coated onto a copper foil and then dried under vacuum at 80 °C for 12 h. Coin cells were assembled in an argon-filled glovebox ( $\text{H}_2\text{O}$  and  $\text{O}_2 < 0.1$  ppm) using lithium foil as the counter and reference electrode, a polymer separator (Celgard 2500), and 1 M  $\text{LiPF}_6$  in EC:DMC:DEC (1:1:1 in volume) as the electrolyte. The cells were tested using a LANHE Battery Test System in the potential range between 0.01 and 3 V at room temperature. Cyclic voltammetry (CV) was measured using an electrochemical workstation (CHI660C). Electrochemical impedance spectra (EIS) were characterized by the same instrument over a frequency range of 100 kHz to 0.01 Hz.

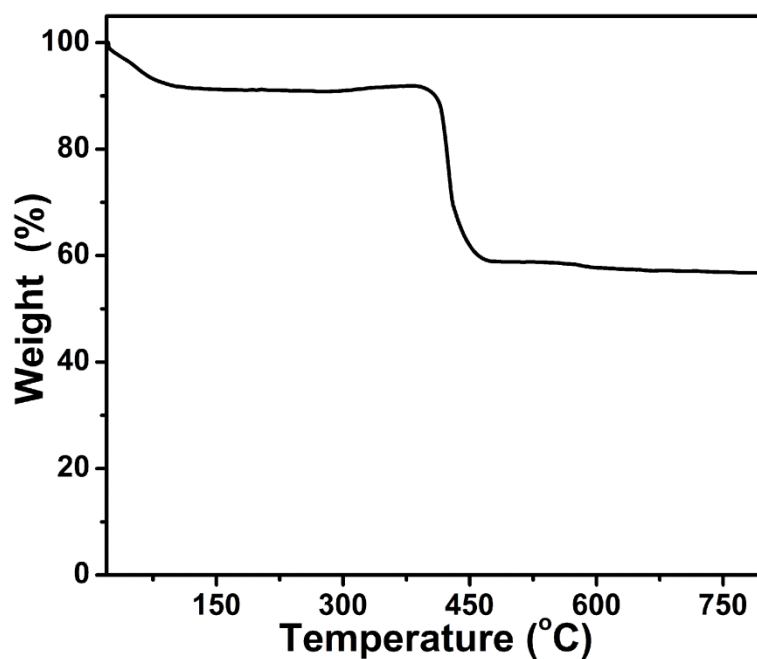

**Figure S1** TG curve of F-Fe<sub>3</sub>N/NPCF composite.

TGA curve for F-Fe<sub>3</sub>N/NPCF composite can be divided into two parts: from 20 °C to 200 °C and from 200 °C to 800 °C. In the first part, a mass loss of approximately 8.9% (wt %) is observed below 200 °C on the TG curve, which can be attributed to the desorption of adsorbed molecules (e.g., CO<sub>2</sub>, H<sub>2</sub>O). In the second part, from 200 °C to 800 °C, the Fe<sub>3</sub>N phase was oxidized into Fe<sub>2</sub>O<sub>3</sub>, accompanying the complete removal of carbon. Based on the remaining weight percent of Fe<sub>2</sub>O<sub>3</sub>, we can calculate the weight percent of 43.2% for Fe<sub>3</sub>N. Thus, the carbon content for the F-Fe<sub>3</sub>N/NPCF composite is approximately 47.9% (1-8.9%-43.2%).

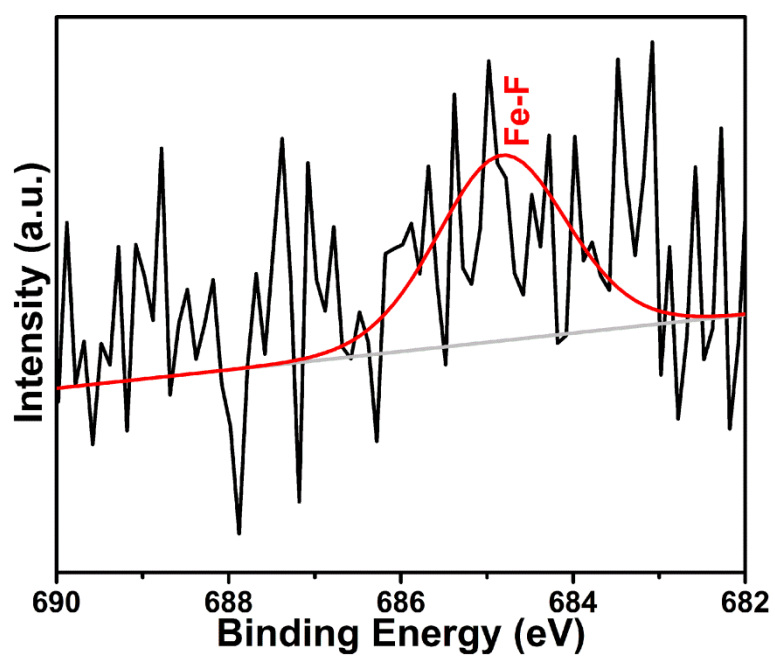

**Figure S2** XPS spectrum of the F 1s region for F-Fe<sub>3</sub>N/NPCF composite.

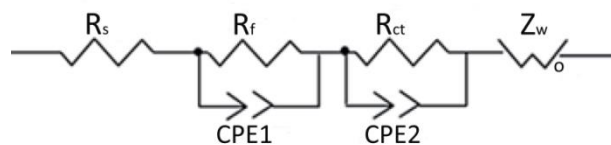

**Figure S3** Equivalent circuit.

**Table S1** Electrochemical impedance parameters of the F-Fe<sub>3</sub>N/NPCF, Fe<sub>3</sub>N/NPCF and Fe<sub>x</sub>N/Fe/NPCF electrodes obtained from equivalent circuit fitting of experimental data.

| Sample                    | Cycle number      | R <sub>s</sub> /Ohm | R <sub>f</sub> /Ohm | R <sub>ct</sub> /Ohm |
|---------------------------|-------------------|---------------------|---------------------|----------------------|
| F-Fe <sub>3</sub> N/NPCF  | after five cycles | 4                   | 34                  | 65                   |
| Fe <sub>3</sub> N/NPCF    | after five cycles | 4                   | 50                  | 74                   |
| Fe <sub>x</sub> N/Fe/NPCF | after five cycles | 4                   | 65                  | 86                   |
